# Movement behaviour responses to environment: fast inference of individual variation with a mixed effects model

I. D. Jonsen<sup>1\*</sup>, C. R. McMahon<sup>2</sup>, T. A. Patterson<sup>3</sup>, M. Auger-Méthé<sup>4</sup>, R. Harcourt<sup>1</sup>, M. A. Hindell<sup>5</sup>, S. Bestley<sup>5</sup>

<sup>1</sup>Dept. of Biological Sciences, Macquarie University, Sydney, Australia

<sup>2</sup>Sydney Institute of Marine Science, Mosman, Australia

<sup>3</sup>CSIRO Marine and Atmospheric Research, Hobart, Australia

<sup>4</sup>Dept. of Statistics and Institute for the Oceans & Fisheries, University of British Columbia, Vancouver, Canada

<sup>5</sup>Institute for Marine and Antarctic Science, University of Tasmania, Hobart, Australia

## 1 **Abstract**

2 Telemetry data provide a rich source of information on animals use of space, habitat pref-  
3 erences and movement behaviour. Yet habitat models fit to these data are blind to the  
4 underlying behavioural context. Conversely, behavioural models accounting for individual  
5 variability are too slow for meaningful analysis of large telemetry datasets. Applying new  
6 fast-estimation tools, we show how a model incorporating mixed effects within a flexible  
7 random walk movement process rapidly infers among-individual variability in environment-  
8 movement behaviour relationships. We demonstrate our approach using southern elephant  
9 seal (*Mirounga leonina*) telemetry data. Seals consistently reduced speed and directional-  
10 ity (move persistence) with increasing sea ice coverage, had variable responses to chloro-  
11 phyll concentration and consistently reduced move persistence in regions where circum-  
12 polar deep water shoaled. Our new modelling framework is extensible and substantively  
13 advances analysis of telemetry data by allowing fast and flexible mixed effects estimation  
14 of potential drivers of movement behaviour processes.

15 **Key Words:** correlated random walk; habitat; individual movement; latent variable;  
16 telemetry; Template Model Builder; random effects; southern elephant seal; habitat model

---

\*Corresponding author: [ian.jonsen@mq.edu.au](mailto:ian.jonsen@mq.edu.au)

## 17 Introduction

18 Understanding animals' use of geographical and environmental space (i.e., where animals  
19 are and why they are there) is one of the central aims of ecology (Rosenzweig, 1981). Move-  
20 ment is the key process that defines space-use at spatial and temporal scales relevant to  
21 individual animals and telemetry is the predominant approach to observe this process  
22 (Kays *et al.*, 2015; Hussey *et al.*, 2015). Inferences about the behavioural context of ani-  
23 mal movements, such as foraging, resting or predator avoidance, are often made by relat-  
24 ing movement behaviour to physical habitat features (e.g., Breed *et al.*, 2017).

25 Various spatial habitat modelling approaches are used to infer animals' space-use and  
26 habitat preferences, through combining telemetry and environmental information, e.g.,  
27 from remotely sensed data (Aarts *et al.*, 2008; Thurfjell *et al.*, 2014; Raymond *et al.*, 2015).  
28 Most habitat models infer animals' habitat preference or selectivity from a combination  
29 of observed (presence) and simulated (pseudo-absence) tracking locations (Aarts *et al.*,  
30 2008) but are generally blind to the behavioural context (e.g., whether animals are mi-  
31 grating, foraging or resting) underlying those inferred preferences. Hidden Markov mod-  
32 els (HMMs) and state-space models (SSMs) can provide this context by inferring (un-  
33 observed) behavioural states, and relating state-switching probabilities to environmental  
34 features (Morales *et al.*, 2004; Patterson *et al.*, 2009; Bestley *et al.*, 2013; Michelot *et al.*,  
35 2016).

36 Both HMMs and SSMs offer great flexibility in modelling movement behaviour as a  
37 function of extrinsic and/or intrinsic drivers (Bestley *et al.*, 2015; Michelot *et al.*, 2017).  
38 Although high individual variation is a commonly reported feature in telemetry analyses,  
39 methods to account for individual variability in movement-environment relationships (e.g.,  
40 using random effects, Pinheiro & Bates, 2000; Bolker *et al.*, 2009) have been implemented  
41 in a limited way to date (Langrock *et al.*, 2012; Bestley *et al.*, 2015). A fully flexible ap-  
42 proach where any sensible combination of fixed and random terms can be considered, that  
43 allows different environmental responses across individuals, has yet to be implemented.

44 This is mainly because complex mixed effects models (Thorson & Minto, 2015) applied to  
45 large time-series can be computationally demanding.

46 Here we present a modelling approach that takes advantage of fast, powerful estimation  
47 tools provided by the relatively new R package Template Model Builder (TMB, Kristensen  
48 *et al.*, 2016). We illustrate a mixed effects modelling approach for animal tracking data  
49 that takes advantage of TMB's fast estimation (Albertsen *et al.*, 2015; Auger-Méthé *et al.*,  
50 2017) to parametrize movement behaviour using a time-varying term for movement persis-  
51 tence. Our primary aim is to show how the approach can be used to infer relationships be-  
52 tween animals' movement behaviour and the environmental features they encounter. These  
53 models can be fit flexibly with single or multiple random effects, enabling inference across  
54 multiple individuals and assessment of the extent to which relationships differ among in-  
55 dividuals. We illustrate our approach using southern elephant seal (*Mirounga leonina*)  
56 telemetry data, with cases demonstrating both sea-ice and oceanic foraging trips, to show  
57 how seals engaging in different foraging tactics may respond differently to their environ-  
58 ment.

## 59 **Materials and methods**

60 Here we describe our mixed effects modelling approach for inference of covariate relation-  
61 ships with movement behaviour. We divide the description of our approach into three sec-  
62 tions. First, we focus on a basic move persistence model that can be used to estimate be-  
63 havioural change along an animal's observed movement trajectory. Second, we show how  
64 this basic model can be expanded to infer how these behavioural changes may be related  
65 to environmental features. We focus on relationships with environmental covariates but  
66 any combination of extrinsic or intrinsic covariates could be modelled provided they are  
67 measured at locations and/or times consistent with the telemetry data. Third, we add ran-  
68 dom effects to the model to enable inference about how these behaviour - environmental  
69 relationships may differ among individual animals.

## 70 **Time-varying move persistence**

71 Our modelling approach focuses on estimation of the persistence (sensu Patlak, 1953) of  
72 consecutive pairs of animal relocations (move steps) along an entire movement trajec-  
73 tory. Move persistence, which captures autocorrelation in both speed and direction, has  
74 been modelled as an average across entire movement trajectories (Jonsen, 2016), indicating  
75 whether that trajectory is, on average, uncorrelated (i.e., a simple random walk or Brown-  
76 ian motion), correlated (i.e., a correlated random walk), or somewhere in between (Codling  
77 *et al.*, 2008). Allowing move persistence to vary along a trajectory means it can be used  
78 as an index of behaviour, identifying segments of relatively low or high persistence. This  
79 model can be written as:

$$\mathbf{d}_t = \gamma_t \mathbf{d}_{t-1} + N(0, \Sigma) \quad (1)$$

80 where  $\mathbf{d}_t$  and  $\mathbf{d}_{t-1}$  are the changes in an animal's location at times  $t$  and  $t - 1$ .  $\Sigma$  is a  
81 variance-covariance matrix specifying the magnitude of randomness in the 2-dimensional  
82 movements.  $\gamma_t$  is the time-varying move persistence (autocorrelation) between displace-  
83 ments  $\mathbf{d}_t$  and  $\mathbf{d}_{t-1}$ .  $\gamma_t$  is continuous-valued between 0 (low move persistence, Fig. 1a,c)  
84 and 1 (high move persistence, Fig. 1b,c). To avoid potential parameter identifiability is-  
85 sues between  $\gamma_t$  and  $\Sigma$ , we set the covariance term in  $\Sigma$  to 0 but note this constraint could  
86 be relaxed. We assume  $\gamma_t$  follows a simple random walk in logit space (to keep  $\gamma_t$  bounded  
87 between 0 and 1):

$$\text{logit}(\gamma_t) = \text{logit}(\gamma_{t-1}) + N(0, \sigma_\gamma) \quad (2)$$

88 where  $\sigma_\gamma$  is a scale parameter describing how much move persistence varies along an ani-  
89 mal's observed movement track.

90 This process model (Eqn's 1 and 2) can be fit either directly to location data with min-  
91 imal error, such as GPS data, fit to SSM-filtered locations, or coupled with an observation  
92 model to fit to error-prone data, such as Argos or light-based geolocation data. We assume

93 the locations occur at regular time intervals, but other implementations can accommodate  
94 irregularly observed location data (Auger-Méthé *et al.*, 2017).

95 The time-varying move persistence model can be used to objectively identify changes  
96 in movement pattern. The  $\gamma_t$ 's are the behavioural index but unlike switching state-space  
97 models (e.g., Jonsen *et al.*, 2005) or hidden Markov models (e.g., Langrock *et al.*, 2012) of  
98 animal movement behaviour, these changes are modelled along a continuum (0 - 1) rather  
99 than as switches between a pre-specified number of discrete states.

### 100 **Move persistence in relation to environment**

101 To make inferences about the factors associated with these behaviours, we can model  $\gamma_t$  as  
102 a linear function of environmental predictors like proportion of ice cover, or other extrin-  
103 sic or intrinsic covariates measured at each location. With this approach, we replace the  
104 random walk on  $\text{logit}(\gamma_t)$  (Eqn 2) with a linear regression of covariates on  $\text{logit}(\gamma_t)$ :

$$\text{logit}(\gamma_t) = \beta_0 + \beta_1 m_{t,1} + \dots + \beta_n m_{t,n} \quad (3)$$

105 where  $\beta_0, \beta_1 \dots \beta_n$  are the fixed intercept and regression coefficients and  $m_{t,1} \dots m_{t,n}$  are  
106 the predictor variables. This model can be fit to a single animal track, or multiple tracks  
107 could be pooled together. Typically, we wish to make inference across multiple individual  
108 tracks and assess the extent to which relationships may differ among individuals.

### 109 **Incorporating individual variability**

110 To account for variation among individual responses to environment, we can expand Eqn  
111 3 to a mixed-effects regression of covariates on  $\text{logit}(\gamma_t)$ , embedded directly in the be-  
112 havioural model:

$$\text{logit}(\gamma_t) = (\beta_0 - b_{0,k}) + (\beta_1 - b_{1,k})m_{t,1,k} + \dots + (\beta_n - b_{n,k})m_{t,n,k} \quad (4)$$

113 where the  $\beta$ 's are the fixed-effect intercept and slope terms as in Eqn 3,  $b_{0,k}$  is a random  
114 deviation for the intercept of the  $k$ -th individual,  $b_{1,k}$  through  $b_{n,k}$  are random deviations  
115 for the slopes of the  $k$ -th individual and  $m_{t,1,k}$  through  $m_{t,n,k}$  are the covariates measured  
116 along the  $k$ -th individual's track.

## 117 Estimation

118 In principle, any combination of fixed and random effects can be specified within the move-  
119 ment model described in equations 1 and 4. However, estimation of multiple random ef-  
120 fects can be extremely computationally demanding and this has limited the use of such  
121 models for animal telemetry data. Here we use TMB to fit the move persistence models  
122 (Auger-Méthé *et al.*, 2017). The TMB package allows complex latent variable mixed ef-  
123 fects models, such as SSMS (Albertsen *et al.*, 2015), to be specified in C++ and fit effi-  
124 ciently via maximum likelihood using reverse-mode auto-differentiation and the Laplace  
125 approximation (Kristensen *et al.*, 2016). The Laplace approximation avoids the need for  
126 high-dimensional integration by using a second-order Taylor expansion that massively  
127 speeds the calculation of the marginal likelihood (e.g., Albertsen *et al.*, 2015). Compar-  
128 ing Bayesian and TMB versions of the same location-filtering model fit to individual Argos  
129 location datasets, Auger-Méthé *et al.* (2017) found a 30-fold decrease in computation time  
130 for the TMB fit with no apparent loss of accuracy.

131 All code for fitting these models in R is available at <https://github.com/ianjensen>.  
132 This code draws on the `lme4` (Bates *et al.*, 2015) and `glmmTMB` (Brooks *et al.*, 2017) R  
133 packages to specify the mixed effects models in a general and flexible manner.

## 134 Data application

135 We demonstrate our move persistence models with 24 adult female southern elephant seal  
136 tracks. The seals were captured at Iles Kerguelen (49.35° S, 70.22° E) between late Jan-  
137 uary and mid-March in 2009 and 2013-2015, at the end of their annual moult. Animal

138 handling and instrument attachment details can be found elsewhere (McMahon *et al.*,  
139 2000; Field *et al.*, 2012; McMahon *et al.*, 2008). These data were sourced from the Aus-  
140 tralian Integrated Marine Observing System (IMOS) deployments at Iles Kerguelen and  
141 are publicly available (<http://imos.aodn.org.au>). The tracks comprise a mixture of sea  
142 ice foraging trips on or near the Antarctic continental shelf (12 seals; Appendix S1.1a) and  
143 entirely pelagic foraging trips in sub-Antarctic waters (12 seals; Appendix S1.1b). Prior  
144 to fitting the move persistence models, we used a TMB implementation of a state-space  
145 model (Jonsen *et al.*, 2005; Auger-Méthé *et al.*, 2017) to filter the observed locations, ac-  
146 counting for error in the Argos telemetry, and to regularize the filtered locations a 12-h  
147 time interval (see Appendix S1 for details).

148 We fit the move persistence model (**mpm**; Eqn's 1 and 2) to the SSM-filtered seal tracks.  
149 To ascertain whether  $\gamma_t$  adequately captures changes in the seals' movement patterns, we  
150 compare the  $\gamma_t$ -based behavioural index from the **mpm** to discrete behavioural states es-  
151 timated from a behavioural switching state-space model (SSSM; Jonsen, 2016) fitted us-  
152 ing the **bsam** R package. Details on how we fit the **bsam** model are in Appendix S2. We  
153 then fit the move persistence mixed effects model (**mpmm**; Eqn's 1 and 4) to the same SSM-  
154 filtered seal tracks to infer how the seals' movement behaviour may be influenced by envi-  
155 ronmental features encountered during their months-long foraging trips. In both analyses,  
156 we fitted separate models to the ice and pelagic foraging trips. For the **mpmm**'s, we specified  
157 mixed effects models with random intercept and slopes to account for variability among  
158 individual seals. We fit all possible combinations of fixed and random effects and use AIC  
159 and likelihood ratios to find the best supported model for each set of tracks.

160 We examined 3 potential environmental correlates of elephant seal movement behaviour:  
161 sea ice cover (the proportion of time the ocean is covered by  $\geq 85\%$  ice; **ice**), chlorophyll  
162 *a* concentration (near-surface summer climatology in  $\text{mg m}^{-3}$ ; **chl**) and the salinity differ-  
163 ence between 600 and 200 m depths (based on winter climatology averaged over 1955-2012  
164 in psu, **saldiff**). Sea ice and chl *a* data were obtained from the Australian Antarctic

165 Data Centre (Raymond, 2014). Salinity data were obtained from the World Ocean Atlas  
166 (Zweng *et al.*, 2013). All three covariates were spatially interpolated to the same 0.1 x 0.1  
167 degree grid covering the spatial domain of the 24 elephant seal tracks (Appendix S3.1).  
168 The environmental data values were then extracted at each seal location from the SSM-  
169 filtered track data. As `saldiff` could not be calculated in areas where the bathymetry was  
170 shallower than 600 m, we did not include this variable in the models fit to the seals mak-  
171 ing ice-bound foraging trips as several of them spent considerable time in waters shallower  
172 than 600 m (Appendix S2.2). Similarly, `ice` was excluded from the models fit to seals  
173 making pelagic foraging trips as they spent relatively little time in regions with sea-ice  
174 cover.

175 R code for the model selection exercise is in Appendix S4.

## 176 Results

### 177 Time-varying move persistence (`mpm`)

178 The ice-bound seals all exhibited similar movement patterns (Fig. 2a), with high move  
179 persistence on their outbound migrations and lower move persistence near the Antarctic  
180 continent in areas of higher sea-ice coverage. Return migrations to Iles Kerguelen were  
181 more variable, with some individuals travelling back in a persistent fashion and others tak-  
182 ing meandering routes, possibly to forage en route. Pelagic foraging seals (Fig. 2b) mi-  
183 grated approximately 2000 km either east or west of Iles Kerguelen in relatively persis-  
184 tent fashion. Less persistent movements occurred at the distal ends of these migrations,  
185 although seals travelling to the west of Iles Kerguelen had markedly less persistent and  
186 slower movements, suggestive of more intense search and foraging, compared to those trav-  
187 elling to the east (Fig. 2b).

188 The  $\gamma_t$ -derived behavioural index is comparable but not identical to the discrete be-  
189 havioural states estimated from the `bsam` SSSM (Fig. S2.1). The  $\gamma_t$  index captured the



190 same changes in movement behaviour but the magnitudes of those changes generally were  
191 smaller. Fitting the move persistence model, including the SSM filtering step, was almost  
192 500 times faster than fitting the `bsam` SSSM (Appendix S2.1).

### 193 **Individual variability in move persistence - environment relationships (mpmm)**

194 *Sea-ice foragers.* The best supported model for elephant seals foraging in the sea-ice zone  
195 included fixed and random coefficients for both the proportion of ice cover and chlorophyll  
196 *a* concentration (Table 1). On average, seals had movements that became less persistent  
197 or directed as sea-ice cover and chlorophyll *a* concentration increased (Fig. 3a,b). Among  
198 individuals, the relationship with `ice` was consistently negative but the degree to which  
199 move persistence declined differed markedly (Fig. 3a), whereas the relationship with `chl`  
200 was highly variable with 4 individuals having strong negative relationships and the rest  
201 weak to moderately positive relationships (Fig. 3b). Unsurprisingly, the `chl` fixed-effect  
202 was not significant (Z-value = -1.04, p = 0.3). Using the fixed-effects from the best sup-  
203 ported model, the spatial prediction of  $\gamma_t$  over the entire spatial domain implies that the  
204 best foraging habitat generally lies south of 65° S (south of the black contour line, Fig.  
205 3d).

206 *Pelagic foragers.* The best supported model for elephant seals foraging pelagically in-  
207 cluded fixed and random coefficients for the salinity difference between 600 and 200 m  
208 depths (`saldiff`, Table 2). On average, seals had movements that became strongly less  
209 persistent as the salinity difference decreased (Fig. 3c). Among individuals, this relation-  
210 ship was moderately variable with two individuals exhibiting relatively small changes in  
211 move persistence over the full range of `saldiff` (Fig. 3c). The spatial prediction of  $\gamma_t$   
212 over the entire spatial domain implies that animals generally adopt a movement behaviour  
213 indicative of search or forage south of 65° S (south of the black contour line, Fig. 3e) or  
214 north in the vicinity of the Subantarctic Front (north of the black contour line, Fig. 3e).

## 215 Discussion

216 Animal telemetry data obtained at the level of individual animals poses a challenge to  
217 scale from individual to population ecology. While correlative statistical analyses using  
218 mixed effects models have been widely applied to behavioural datasets (e.g., marine ani-  
219 mal diving and bird migration ecology analyses, Hassrick *et al.*, 2010; Mandel *et al.*, 2008),  
220 individual variability currently is incorporated into process-based models of movement be-  
221 haviour in a relatively limited way. This is partly due to the extra complexity required for  
222 building random effects into a process-oriented approach (i.e., the temporal nature of the  
223 data are taken into account explicitly) though primarily due to the significant computa-  
224 tional overhead entailed. Our method uses TMB estimation for a process model describ-  
225 ing animal movement behaviour in direct relation to environmental features. Our results  
226 show this enables multiple fixed and random effects in movement-environment relation-  
227 ships to be fit simply and efficiently. Taking advantage of TMB's speed and power, this  
228 approach provides a feasible solution to analysing increasingly large and detailed telemetry  
229 datasets, and for harnessing individual-to-population level information on animal move-  
230 ment responses to environment.

## 231 Environmental responses

232 Our analyses revealed relatively consistent responses by individual animals to environmen-  
233 tal variables we tested, however substantial individual variability was also a persistent fea-  
234 ture of the telemetry data. Comparisons of model structures allowed these individual-level  
235 effects to be directly evaluated. Those animals whose forage migrations went towards the  
236 Antarctic continent showed low move persistence once in areas of higher sea ice coverage.  
237 Some individuals also showed positive responses to elevated chlorophyll a concentrations,  
238 targeting productive coastal polynya areas (Malpress *et al.*, 2017; Labrousse *et al.*, 2018);  
239 however this was not a persistent response with many others foraging farther offshore in  
240 the marginal ice zone (Labrousse *et al.*, 2015) where chlorophyll a concentrations are lower

241 (Appendix S3.1). For the pelagic foraging animals, our results indicated seals moved per-  
242 sistently away from the region in which salty Circumpolar Deep Water was confined to  
243 depths (i.e., where the salinity difference was highly positive). The majority then adopted  
244 a lower move persistence in areas where the CDW shoaled (salinity difference closer to  
245 zero, southern areas) with four animals targeting the vicinity of the Subantarctic Front  
246 (salinity difference negative) where cold fresh Antarctic Intermediate Water subducts un-  
247 der saline Subantarctic surface waters (northwestern areas, Appendix S3.1).

248 Substantial variability among individuals is a persistent feature reported from animal  
249 telemetry data (e.g., Block *et al.*, 2011). Understanding this variability is essential for  
250 scaling from data collected on individuals up to inferences of population-level processes  
251 (Morales *et al.*, 2010) and for predicting future responses to a changing environment. For  
252 example, within the Southern Ocean climatic changes are impacting the sea-ice extent and  
253 duration, the location of major oceanic frontal features, and potentially the meridional  
254 overturning circulation (whereby water masses sink and rise as governed by density gradi-  
255 ents) with large-scale consequences for marine ecosystem structure, function and produc-  
256 tivity (Constable *et al.*, 2014).

257 We used environmental climatologies to demonstrate our data application, however  
258 for many analyses relevant covariates may be extracted from time-varying environmen-  
259 tal fields. Many automated options for this exist via websites such as ZoaTrack (<http://www.zoatrack.org/>) managed by the Atlas of Living Australia or Xtractomatic (<http://coastwatch.pfel.noaa.gov/xtracto/>) managed by the US National Oceanic and  
262 Atmospheric Administration. We also note here the need to incorporate location uncer-  
263 tainty when sampling environmental covariates from spatially gridded remote-sensing data.  
264 This can be done using multiple imputation methods as implemented in momentuHMM R  
265 package (McClintock & Michelot, 2018), i.e., drawing realizations of the locations from the  
266 uncertainty of the location-filtering SSM estimates.

## 267 **Individual variation**

268 Although the ultimate source of observed individual differences in behaviour - environ-  
269 ment relationships is often unclear, two non-exclusive explanations seem likely. First, we  
270 often use relatively few predictors and these may represent the proximate influences which  
271 predators are actually responding to (i.e., prey density and/or distribution) indirectly or  
272 imperfectly. This may inflate apparent individual differences in predator movement be-  
273 haviour. Modelling more direct indices of prey availability, and/or reducing error within  
274 covariates by accounting for location uncertainty as discussed above, may help to reduce  
275 apparent variation among individuals.

276 Second, individual variation is likely a real feature of foraging ecology (Magurran, 1993),  
277 where individual quality and personality (Dall *et al.*, 2004; Stamps, 2007) may confer real  
278 differences in foraging behaviour with relatively little difference in fitness (Mangel & Stamps,  
279 2001). For example, consistent boldness in foraging can generate important ecological  
280 trade-offs, effecting increases in both growth and mortality rates (Stamps, 2007; Bergvall  
281 *et al.*, 2011; Chapman *et al.*, 2011). Research into behavioural syndromes along axes, such  
282 as boldness-shyness or proactiveness-reactiveness (Sih *et al.*, 2004), may provide insight  
283 into the functional connection between individual behavioural traits and physiological con-  
284 sequences (e.g. via metabolic rates, reproductive success or mortality rates), and hence the  
285 evolutionary significance for ecological patterns and processes. Individual differences likely  
286 represent yet another characteristic contributing to survival and resilience in a complex  
287 and variable environment.

## 288 **Modelling approach and extensions**

289 Our model is composed of a linear mixed effects regression embedded within a correlated  
290 random walk process model for animal movement behaviour. While the linear mixed ef-  
291 fects approach allows flexible combinations of fixed and random effects, there is scope for  
292 further enhancement. In many cases parametric, linear fixed effects may not adequately

293 capture the complexity of movement behaviour - environment relationships and a nonpara-  
294 metric approach using penalised splines may yield improved inference (Langrock *et al.*,  
295 2017). Our random effects currently use an unstructured covariance matrix that may be  
296 less appropriate given the serial dependence structure typical of telemetry data. A first-  
297 order autoregressive covariance structure may better account for this dependence (Pinheiro  
298 & Bates, 2000). Finally, diagnosing lack of fit in latent variable models can be problematic  
299 as there is no "observed response" variable. One-step-ahead prediction residuals provide a  
300 useful model validation tool and can be estimated when fitting the model (Thygesen *et al.*,  
301 2017).

302 This work addresses a key improvement in the quantitative integration of animal move-  
303 ment behaviour and environment. Habitat models are presently the dominant method for  
304 inference of environmental drivers of species' habitat preferences and space-use but largely  
305 ignore the behavioural context underlying observed animal locations. By modelling ani-  
306 mal movement behaviours as a mixed effects function of environmental variables, we gain  
307 deeper insight into how individuals and populations actually use habitat. Additional ef-  
308 fort is required to converge movement behaviour and habitat modelling approaches. For  
309 example, our behavioural models do not account for availability/accessibility of habitat in  
310 any way but this clearly must be considered when inferring habitat preferences (Wakefield  
311 *et al.*, 2011). A reasonable approach for this might be to use the movement process param-  
312 eters to simulate animal tracks and examine implications of including/excluding environ-  
313 mental covariates. These pseudo-absence tracks may be used as the basis for developing a  
314 habitat accessibility surface and generating spatial predictions of animal behaviour condi-  
315 tional on this (e.g., Raymond *et al.*, 2015).

316 Our results show that TMB facilitates the fast estimation of multiple random effects  
317 by using the Laplace approximation to calculate the marginal likelihood of a movement  
318 behaviour process model. The model selection we conducted on the 24 southern elephant  
319 seal tracks took a total of 8 minutes to complete. This includes the time required to SSM

320 filter the original Argos tracks and to fit the `mppmm`'s and is approximately 1500 times faster  
321 than a more limited hierarchical Bayesian model selection exercise, using Markov chain  
322 Monte Carlo simulation (Bestley *et al.*, 2013). The dramatically faster computation times  
323 achieved by our TMB-enabled approach means that similar analyses of movement be-  
324 haviour - environmental relationships can be scaled up to very large telemetry datasets.  
325 This computation speed also opens up possibilities for far more realistic models of animal  
326 movement, incorporating the third dimension for diving or flying animals and/or high-  
327 volume accelerometry data.

328 The process model used here differs markedly from SSM used by Bestley *et al.* (2013).  
329 They used discrete behavioural state Markov-switching (Patterson *et al.*, 2009; Langrock  
330 *et al.*, 2012) embedded in a correlated random walk process model (Jonsen, 2016). Here,  
331 we used a time-varying move persistence parameter  $\gamma_t$  as a behavioural index that varied  
332 continuously between 0 and 1. This continuous behavioural index provides another tool for  
333 characterising animal movement patterns and for making inferences about the possible en-  
334 vironmental drivers of animal movement behaviour. In some cases, a continuous index may  
335 offer more nuanced insight into variable behavioural sequences (Gurarie *et al.*, 2009; Breed  
336 *et al.*, 2012), whereas a discrete state approach may offer more flexibility in capturing the  
337 known structure of animal movement patterns (e.g., Michelot *et al.*, 2017).

## 338 **Acknowledgements**

339 We thank T. Michelot, T. Photopoulou, U. Thygesen and S. Wotherspoon for helpful in-  
340 sights during model development and on the manuscript. This work developed under the  
341 Climate Impacts on Top Predators (CLIOTOP) Task Team 2016-06 on Animal Movement  
342 and Prediction and under the Centre for the Synthesis and Analysis of Biodiversity project  
343 - Retrospective Analysis of Antarctic Tracking Data. It contributes to the Australian Re-  
344 search Council Discovery Early Career Research Award (DECRA) granted to S.B. under  
345 Project DE180100828. I.D.J. was supported by a Macquarie University Vice-Chancellors

346 Innovation Fellowship and a Macquarie University Co-Funded Fellowship. T.A.P. was sup-  
347 ported by a CSIRO Julius Career Award and the Villum Foundation. The seal tracks were  
348 collected with support from the Integrated Marine Observing System (IMOS). IMOS is a  
349 national collaborative research infrastructure, supported by the Australian Government.  
350 IMOS is operated by a consortium of institutions as an unincorporated joint venture, with  
351 the University of Tasmania as Lead Agent. All tagging procedures were approved and car-  
352 ried out under the guidelines of the University of Tasmania Animal Ethics Committee.

## 353 **References**

- 354 Aarts, G., MacKenzie, M., McConnell, B., Fedak, M. & Matthiopoulos, J. (2008). Esti-  
355 mating space-use and habitat preference from wildlife telemetry data. *Ecography*, 31,  
356 140–160.
- 357 Albertsen, C. M., Whoriskey, K., Yurkowski, D., Nielsen, A. & Mills Flemming, J. (2015).  
358 Fast fitting of non-Gaussian state-space models to animal movement data via Template  
359 Model Builder. *Ecology*, 96, 2598–2604.
- 360 Auger-Méthé, M., Albertsen, C. M., Jonsen, I. D., Derocher, A. E., Lidgard, D. C.,  
361 Studholme, K. R., Bowen, W. D., Crossin, G. T. & Flemming, J. M. (2017). Spatiotem-  
362 poral modelling of marine movement data using Template Model Builder (TMB). *Ma-  
363 rine Ecology Progress Series*, 565, 237–249.
- 364 Bates, D., Mächler, M., Bolker, B. & Walker, S. (2015). Fitting linear mixed-effects models  
365 using lme4. *Journal of Statistical Software*, 67, 1–48.
- 366 Bergvall, U. A., Schäppers, A., Kjellander, P. & Weiss, Q. (2011). Personality and foraging  
367 decisions in fallow deer, *Dama dama*. *Animal Behaviour*, 81, 101–112.
- 368 Bestley, S., Jonsen, I. D., Hindell, M. A., Guinet, C. & Charrassin, J.-B. (2013). Inte-  
369 grative modelling of animal movement: incorporating in situ habitat and behavioural

- 370 information for a migratory marine predator. *Proceedings of the Royal Society B*, 280,  
371 20122262.
- 372 Bestley, S., Jonsen, I. D., Hindell, M. A., Harcourt, R. G. & Gales, N. J. (2015). Taking  
373 animal tracking to new depths: synthesizing horizontal-vertical movement relationships  
374 for four marine predators. *Ecology*, 96, 417–427.
- 375 Block, B. A., Jonsen, I. D., Jorgensen, S. J., Winship, A. W., Shaffer, S. A., Bograd, S. J.,  
376 Hazen, E. L., Foley, D. G., Breed, G. A., Harrison, A. L., Ganong, J. E., Swithenbank,  
377 A., Castleton, M., Dewar, H., Mate, B. R., Shillinger, G. L., Schaefer, M. K., Benson,  
378 S. R., Wiese, M. J., Henry, R. W. & Costa, D. P. (2011). Tracking apex marine predator  
379 movements in a dynamic ocean. *Nature*, 475, 86–90.
- 380 Bolker, B. M., Brooks, M. E., Clark, C. J., Geange, S. W., Poulsen, J. R., Stevens, M.  
381 H. M. & White, J.-S. S. (2009). Generalized linear mixed models: a practical guide for  
382 ecology and evolution. *Trends in Ecology and Evolution*, 24, 127–135.
- 383 Breed, G. A., Costa, D. P., Jonsen, I. D., Robinson, P. W. & Flemming, J. M. (2012).  
384 State-space methods for more completely capturing behavioural dynamics from animal  
385 tracks. *Ecological Modelling*, 235-236, 49–58.
- 386 Breed, G. A., Matthews, C. J. D., Marcoux, M., Higdon, J. W., LeBlanc, B., Petersen,  
387 S. D., Orr, J., Reinhart, N. R. & Ferguson, S. H. (2017). Sustained disruption of nar-  
388 whal habitat use and behavior in the presence of arctic killer whales. *Proceedings of the*  
389 *National Academy of Sciences*, 114, 2628–2633.
- 390 Brooks, E., M., Kristensen, Kasper, van Benthem, J., K., Magnusson, Arni, Berg, W., C.,  
391 Nielsen, Anders, Skaug, J., H., Maechler, Martin, Bolker & M., B. (2017). Modeling  
392 zero-inflated count data with glmmTMB. *bioRxiv preprint bioRxiv:132753*. URL [http://](http://biorxiv.org/content/early/2017/05/01/132753)  
393 [biorxiv.org/content/early/2017/05/01/132753](http://biorxiv.org/content/early/2017/05/01/132753).



- 394 Chapman, B. B., Hulthén, K., Blomqvist, D. R., Hansson, L.-A., Nilsson, J.-A., Brodersen,  
395 J., Nilsson, P. A., Skov, C. & Brönmark, C. (2011). To boldly go: individual differences  
396 in boldness influence migratory tendency. *Ecology Letters*, 14, 871–876.
- 397 Codling, E. A., Plank, M. J. & Benhamou, S. (2008). Random walk models in biology.  
398 *Journal of the Royal Society Interface*, 5, 813–834.
- 399 Constable, A. J., Melbourne--Thomas, J., Corney, S. P., Arrigo, K. R., Barbraud, C.,  
400 Barnes, D. K. A., Bindoff, N. L., Boyd, P. W., Brandt, A., Costa, D. P., Davidson,  
401 A. T., Ducklow, H. W., Emmerson, L., Fukuchi, M., Gutt, J., Hindell, M. A., Hofmann,  
402 E. E., Hosie, G. W., Iida, T., Jacob, S., Johnston, N. M., Kawaguchi, S., Kokubun,  
403 N., Koubbi, P., Lea, M., Makhado, A., Massom, R. A., Meiners, K., Meredith, M. P.,  
404 Murphy, E. J., Nicol, S., Reid, K., Richerson, K., Riddle, M. J., Rintoul, S. R., Smith,  
405 W. O., Southwell, C., Stark, J. S., Sumner, M., Swadling, K. M., Takahashi, K. T.,  
406 Trathan, P. N., Welsford, D. C., Weimerskirch, H., Westwood, K. J., Wienecke, B. C.,  
407 Wolf-Gladrow, D., Wright, S. W., Xavier, J. C. & Ziegler, P. (2014). Climate change  
408 and Southern Ocean ecosystems I: how changes in physical habitats directly affect ma-  
409 rine biota. *Global Change Biology*, 20, 3004–3025.
- 410 Dall, S. R. X., Houston, A. I. & McNamara, J. M. (2004). The behavioural ecology of per-  
411 sonality: consistent individual differences from an adaptive perspective. *Ecology Letters*,  
412 7, 734–739.
- 413 Field, I. C., Harcourt, R. G., Boehme, L., de Bruyn, P. J. N., Charrassin, J. B., McMa-  
414 hon, C. R., Bester, M. N., Fedak, M. A. & Hindell, M. A. (2012). Refining instrument  
415 attachment on phocid seals. *Marine Mammal Science*, 28, E325–E332.
- 416 Gurarie, E., Andrews, R. D. & Laidre, K. L. (2009). A novel method for identifying be-  
417 havioural changes in animal movement data. *Ecology Letters*, 12, 395–408.
- 418 Hassrick, J. L., Crocker, D. E., Teutschel, N. M., McDonald, B. I., Robinson, P. W., Sim-

419 mons, S. E. & Costa, D. P. (2010). Condition and mass impact oxygen stores and dive  
420 duration in adult female northern elephant seals. *Journal of Experimental Biology*, 213,  
421 585–592.

422 Hussey, N. E., Kessel, S. T., Aarestrup, K., Cooke, S. J., Cowley, P. D., Fisk, A. T., Har-  
423 court, R. G., Holland, K. N., Iverson, S. J., Kocik, J. F., Flemming, J. E. M. & Who-  
424 riskey, F. G. (2015). Aquatic animal telemetry: A panoramic window into the underwa-  
425 ter world. *Science*, 348.

426 Jonsen, I. (2016). Joint estimation over multiple individuals improves behavioural state  
427 inference from animal movement data. *Scientific Reports*, 6, 20625.

428 Jonsen, I. D., Flemming, J. M. & Myers, R. A. (2005). Robust state–space modeling of  
429 animal movement data. *Ecology*, 86, 2874–2880.

430 Kays, R., Crofoot, M. C., Jetz, W. & Wikelski, M. (2015). Terrestrial animal tracking as  
431 an eye on life and planet. *Science*, 348.

432 Kristensen, K., Nielsen, A., Berg, C. W., Skaug, H. & Bell, B. M. (2016). TMB: Auto-  
433 matic differentiation and Laplace approximation. *Journal of Statistical Software*, 70,  
434 1–21.

435 Labrousse, S., Vacquié-Garcia, J., Heerah, K., Guinet, C., Sallée, J.-B., Authier, M., Pi-  
436 card, B., Roquet, F., Bailleul, F., Hindell, M. *et al.* (2015). Winter use of sea ice and  
437 ocean water mass habitat by southern elephant seals: The length and breadth of the  
438 mystery. *Progress in Oceanography*, 137, 52–68.

439 Labrousse, S., Williams, G., Tamura, T., Bestley, S., Sallée, J.-B., Fraser, A. D., Sumner,  
440 M., Roquet, F., Heerah, K., Picard, B. *et al.* (2018). Coastal polynyas: Winter oases for  
441 subadult southern elephant seals in East Antarctica. *Scientific Reports*, 8, 3183.

- 442 Langrock, R., King, R., Matthiopoulos, J., Thomas, L., Fortin, D. & Morales, J. M.  
443 (2012). Flexible and practical modeling of animal telemetry data: hidden Markov mod-  
444 els and extensions. *Ecology*, 93, 2336–2342.
- 445 Langrock, R., Kneib, T., Glennie, R. & Michelot, T. (2017). Markov-switching generalized  
446 additive models. *Statistics and Computing*, 27, 259–270.
- 447 Magurran, A. E. (1993). Individual differences and alternate behaviours. In: *Behaviour of*  
448 *teleost fishes, 2nd ed.* (ed. Pitcher, T. J.). Chapman & Hall, London, UK.
- 449 Malpress, V., Bestley, S., Corney, S., Welsford, D., Labrousse, S., Sumner, M. & Hindell,  
450 M. (2017). Bio-physical characterisation of polynyas as a key foraging habitat for ju-  
451 venile male southern elephant seals (*Mirounga leonina*) in Prydz Bay, East Antarctica.  
452 *PloS One*, 12, e0184536.
- 453 Mandel, J. T., Bildstein, K. L., Bohrer, G. & Winkler, D. W. (2008). Movement ecology  
454 of migration in turkey vultures. *Proceedings of the National Academy of Sciences*, 105,  
455 19102–19107.
- 456 Mangel, M. & Stamps, J. (2001). Trade-offs between growth and mortality and the main-  
457 tenance of individual variation in growth. *Evolutionary Ecology Research*, 3, 583–593.
- 458 McClintock, B. T. & Michelot, T. (2018). momentuHMM: R package for generalized hid-  
459 den markov models of animal movement. *Methods in Ecology and Evolution*.
- 460 McMahan, C. R., Burton, H. R., McLean, S., Slip, D. & Bester, M. N. (2000). Field im-  
461 mobilisation of southern elephant seals with intravenous tiletamine and zolazepam. *Vet-*  
462 *erinary Record*, 146, 251–254.
- 463 McMahan, C. R., Field, I. C., Bradshaw, C. J. A., White, G. C. & Hindell, M. A. (2008).  
464 Tracking and data-logging devices attached to elephant seals do not affect individual  
465 mass gain or survival. *Journal of Experimental Marine Biology and Ecology*, 360, 71–77.

- 466 Michelot, T., Langrock, R., Bestley, S., Jonsen, I. D., Photopoulou, T. & Patterson, T. A.  
467 (2017). Estimation and simulation of foraging trips in land-based marine predators.  
468 *Ecology*, 98, 1932–1944.
- 469 Michelot, T., Langrock, R., Patterson, T. A. & McNerny, G. (2016). moveHMM: an R  
470 package for the statistical modelling of animal movement data using hidden Markov  
471 models. *Methods in Ecology and Evolution*, 7, 1308–1315.
- 472 Morales, J. M., Haydon, D. T., Frair, J., Holsinger, K. E. & Fryxell, J. M. (2004). Ex-  
473 tracting more out of relocation data: Building movement models as mixtures of random  
474 walks. *Ecology*, 85, 2436–2445.
- 475 Morales, J. M., Moorcroft, P. R., Matthiopoulos, J., Frair, J. L., Kie, J. G., Powell, R. A.,  
476 Merrill, E. H. & Haydon, D. T. (2010). Building the bridge between animal movement  
477 and population dynamics. *Philosophical Transactions of the Royal Society of London B:*  
478 *Biological Sciences*, 365, 2289–2301.
- 479 Patlak, C. S. (1953). Random walk with persistence and external bias. *Bulletin of Mathe-*  
480 *matics and Biophysics*, 15, 311–338.
- 481 Patterson, T. A., Basson, M., Bravington, M. V. & Gunn, J. S. (2009). Classifying move-  
482 ment behaviour in relation to environmental conditions using hidden Markov models.  
483 *Journal of Animal Ecology*, 78, 1113–1123.
- 484 Pinheiro, J. C. & Bates, D. M. (2000). *Mixed-effect models in S and S-plus*. Springer-  
485 Verlag, New York.
- 486 Raymond, B. (2014). Polar environmental data layers. CAASM Metadata, Australian  
487 Antarctic Data Centre. URL [https://data.aad.gov.au/metadata/records/Polar\\_](https://data.aad.gov.au/metadata/records/Polar_Environmental_Data)  
488 [Environmental\\_Data](https://data.aad.gov.au/metadata/records/Polar_Environmental_Data).

- 489 Raymond, B., Lea, M.-A., Patterson, T., Andrews-Goff, V., Sharples, R., Charrassin,  
490 J.-B., Cottin, M., Emmerson, L., Gales, N., Gales, R., Goldsworthy, S. D., Harcourt,  
491 R., Kato, A., Kirkwood, R., Lawton, K., Ropert-Coudert, Y., Southwell, C., van den  
492 Hoff, J., Wienecke, B., Woehler, E. J., Wotherspoon, S. & Hindell, M. A. (2015). Impor-  
493 tant marine habitat off east Antarctica revealed by two decades of multi-species preda-  
494 tor tracking. *Ecography*, 38, 121–129.
- 495 Rosenzweig, M. L. (1981). A theory of habitat selection. *Ecology*, 62, 327–335.
- 496 Sih, A., Bell, A. & Johnson, J. C. (2004). Behavioral syndromes: an ecological and evolu-  
497 tionary overview. *Trends in Ecology & Evolution*, 19, 372–378.
- 498 Stamps, J. A. (2007). Growth-mortality tradeoffs and 'personality traits' in animals. *Ecol-*  
499 *ogy Letters*, 10, 355–363.
- 500 Thorson, J. T. & Minto, C. (2015). Mixed effects: a unifying framework for statistical  
501 modelling in fisheries biology. *ICES Journal of Marine Science*, 72, 1245–1256.
- 502 Thurfjell, H., Cuiti, S. & Boyce, M. S. (2014). Applications of step-selection functions in  
503 ecology and conservation. *Movement Ecology*, 2, 4.
- 504 Thygesen, U. H., Albertsen, C. M., Berg, C. W., Kristensen, K. & Neilsen, A. (2017). Val-  
505 idation of ecological state space models using the Laplace approximation. *Environmental*  
506 *and Ecological Statistics*.
- 507 Wakefield, E. D., Phillips, R. A., Trathan, P. N., Arata, J., Gales, R., Huin, N., Robert-  
508 son, G., Waugh, S. M., Weimerskirch, H. & Matthiopoulos, J. (2011). Habitat pref-  
509 erence, accessibility, and competition limit the global distribution of breeding Black-  
510 browed Albatrosses. *Ecological Monographs*, 81, 141–167.
- 511 Zweng, M. M., Reagan, J. R., Antonov, J. I., Locarnini, R. A., Mishonov, A. V., Boyer,  
512 T. P., Garcia, H. E., Baranova, O. K., Johnson, D. R., Seidov, D. & Biddle, M. M.

513 (2013). Salinity. In: *World Ocean Atlas 2013, Volume 2* (eds. Levitus, S. & Mishonov,  
514 A.), NOAA Atlas. NESDIS 74, p. 39 pp. URL [https://www.nodc.noaa.gov/OC5/  
515 woa13/pubwoa13.html](https://www.nodc.noaa.gov/OC5/woa13/pubwoa13.html).

Table 1: Model rankings by  $\Delta$ AIC and likelihood ratios (LR) for the MPMM’s fit to the 12 ice foraging seals. Absolute AIC and deviance values for the best ranked model are displayed on the first row, under the  $\Delta$ AIC and LR headings. All other  $\Delta$ AIC and LR values are relative to the best ranked model. Computation time to convergence is also reported. Random effects are included in parentheses in the model formulas, following the `lme4` convention (Bates *et al.*, 2015).

| Model formula                       | df | $\Delta$ AIC | LR       | Time (s) |
|-------------------------------------|----|--------------|----------|----------|
| $\sim$ ice + chl + (ice + chl   id) | 12 | -9954.21     | -9978.21 | 4.76     |
| $\sim$ ice + chl + (chl   id)       | 9  | 0.78         | 6.78     | 3.61     |
| $\sim$ ice + chl + (1   id)         | 7  | 21.06        | 31.06    | 4.17     |
| $\sim$ ice + (1   id)               | 6  | 21.08        | 33.08    | 2.63     |
| $\sim$ ice + chl + (ice   id)       | 9  | 23.59        | 29.59    | 5.76     |
| $\sim$ ice + (ice   id)             | 8  | 24.14        | 32.14    | 4.55     |
| $\sim$ chl + (chl   id)             | 8  | 219.74       | 227.74   | 4.09     |
| $\sim$ chl + (1   id)               | 6  | 245.16       | 257.16   | 3.48     |
| $\sim$ 1 + (1   id)                 | 5  | 339.28       | 353.28   | 2.79     |

Table 2: Model rankings by  $\Delta$ AIC and likelihood ratios (LR) for the MPMM’s fit to the 12 ice foraging seals. Absolute AIC and deviance values for the best ranked model are displayed on the first row, under the  $\Delta$ AIC and LR headings. All other  $\Delta$ AIC and LR values are relative to the best ranked model. Computation time to convergence is also reported. Random effects are included in parentheses in the model formulas, following the lme4 convention (Bates *et al.*, 2015).

| Model formula                               | df | $\Delta$ AIC | LR        | Time (s) |
|---------------------------------------------|----|--------------|-----------|----------|
| $\sim$ saldiff + (saldiff   id)             | 8  | -13897.26    | -13913.26 | 3.87     |
| $\sim$ saldiff + chl + (saldiff   id)       | 9  | 1.68         | -0.32     | 4.96     |
| $\sim$ saldiff + chl + (chl   id)           | 9  | 3.25         | 1.25      | 3.97     |
| $\sim$ saldiff + chl + (1   id)             | 7  | 29.81        | 31.81     | 4.04     |
| $\sim$ saldiff + (1   id)                   | 6  | 36.35        | 40.35     | 3.21     |
| $\sim$ chl + (chl   id)                     | 8  | 51.37        | 51.37     | 4.54     |
| $\sim$ chl + (1   id)                       | 6  | 107.41       | 111.41    | 4.19     |
| $\sim$ 1 + (1   id)                         | 5  | 129.93       | 135.93    | 2.34     |
| $\sim$ saldiff + chl + (saldiff + chl   id) | 12 | NA*          | NA*       | 6.02     |

\*model failed to converge



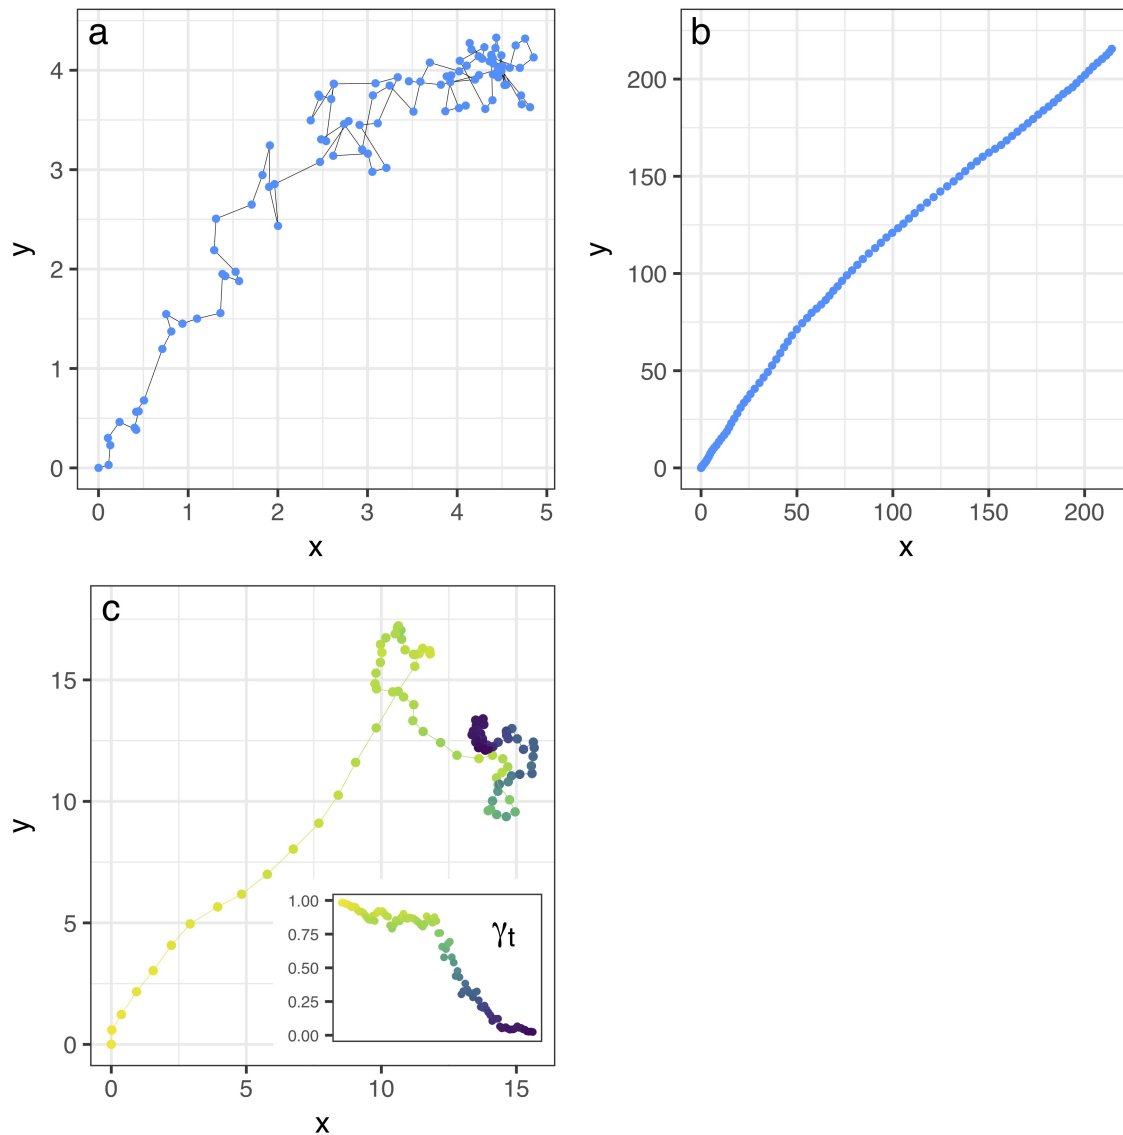

Figure 1: Example tracks simulated from the move persistence model with  $\gamma_t$  set to a constant 0.01 (low persistence) (a),  $\gamma_t$  set to a constant 0.99 (high persistence) and a time-varying  $\gamma_t$  (c). Locations in c are coloured by  $\gamma_t$  values with the random walk time-evolution of  $\gamma_t$  displayed inset in c. Note the substantially different scales of movement across panels a - c, despite sharing the same process covariance matrix ( $\Sigma$ ). See Appendix S1 for simulation code.

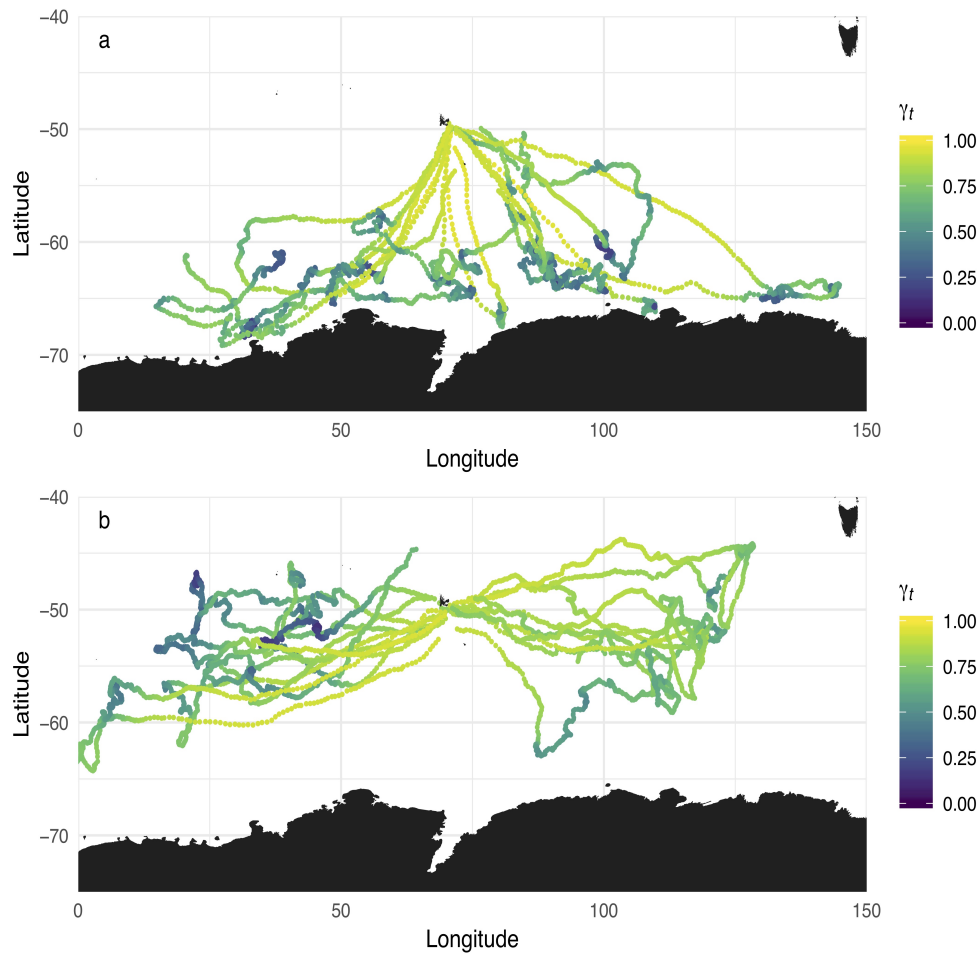

Figure 2: Maps of SSM-filtered southern elephant seal tracks originating from Iles Kerguelen. Ice-bound foraging trips (a) were predominantly directed to locations south of 60°S, whereas pelagic foraging trips (b) are predominantly north of 60°S. Each location is coloured according to its associated move persistence (see  $\gamma_t$  scale bar) estimated from the move persistence model.

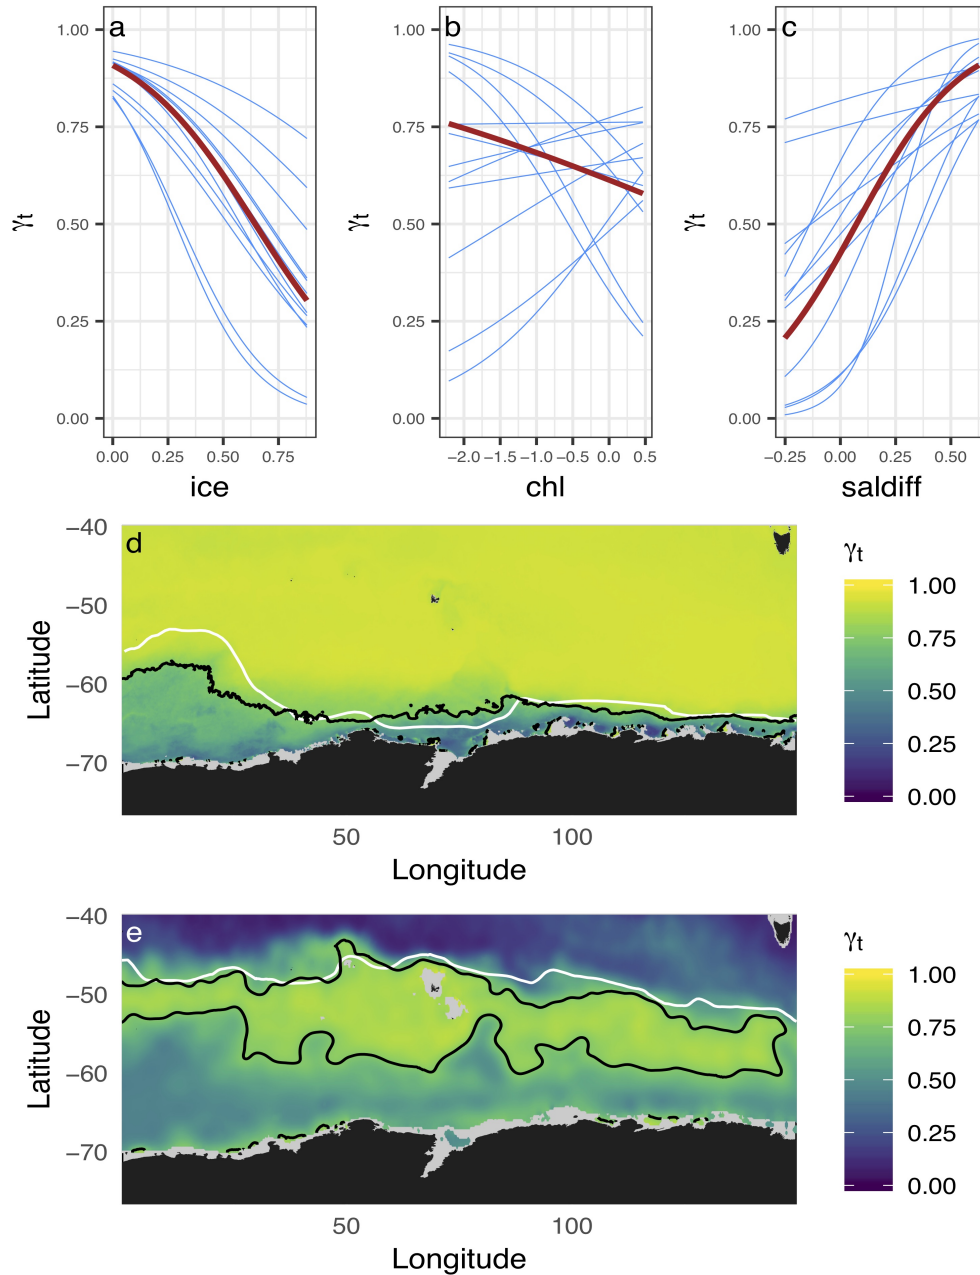

Figure 3: Fixed (red) and random (blue) effects relationships between move persistence  $\gamma_t$  and the proportion of ice cover (a) and chlorophyll *a* concentration (b) for ice foraging seals, and between  $\gamma_t$  and the salinity difference between 600 and 200m (c) for pelagic foraging seals. All three panels display both random intercept and slopes, as per the best ranked models in Tables 1 and 2. Spatial predictions of  $\gamma_t$  based on the fixed effect coefficients for the best fitting models for ice foraging seals (d) and pelagic foraging seals (e). The  $\gamma_t = 0.75$  contour (black line) is displayed to aid delineation of predicted high move persistence ( $\gamma_t > 0.75$ ; green - yellow) and low move persistence regions ( $\gamma_t \leq 0.75$ ; green - blue). The southern boundary of the Antarctic Circumpolar Current (d) and the Subantarctic Front (e) are displayed for reference (white lines).
